# Supplementary material for: New section and species in Talaromyces
Source: PubMed Central journal article supplement (PMC7360636; doi:10.3897/mycokeys.68.52092), 2020-07-07

Sect. *Talaromyces*  
CaM

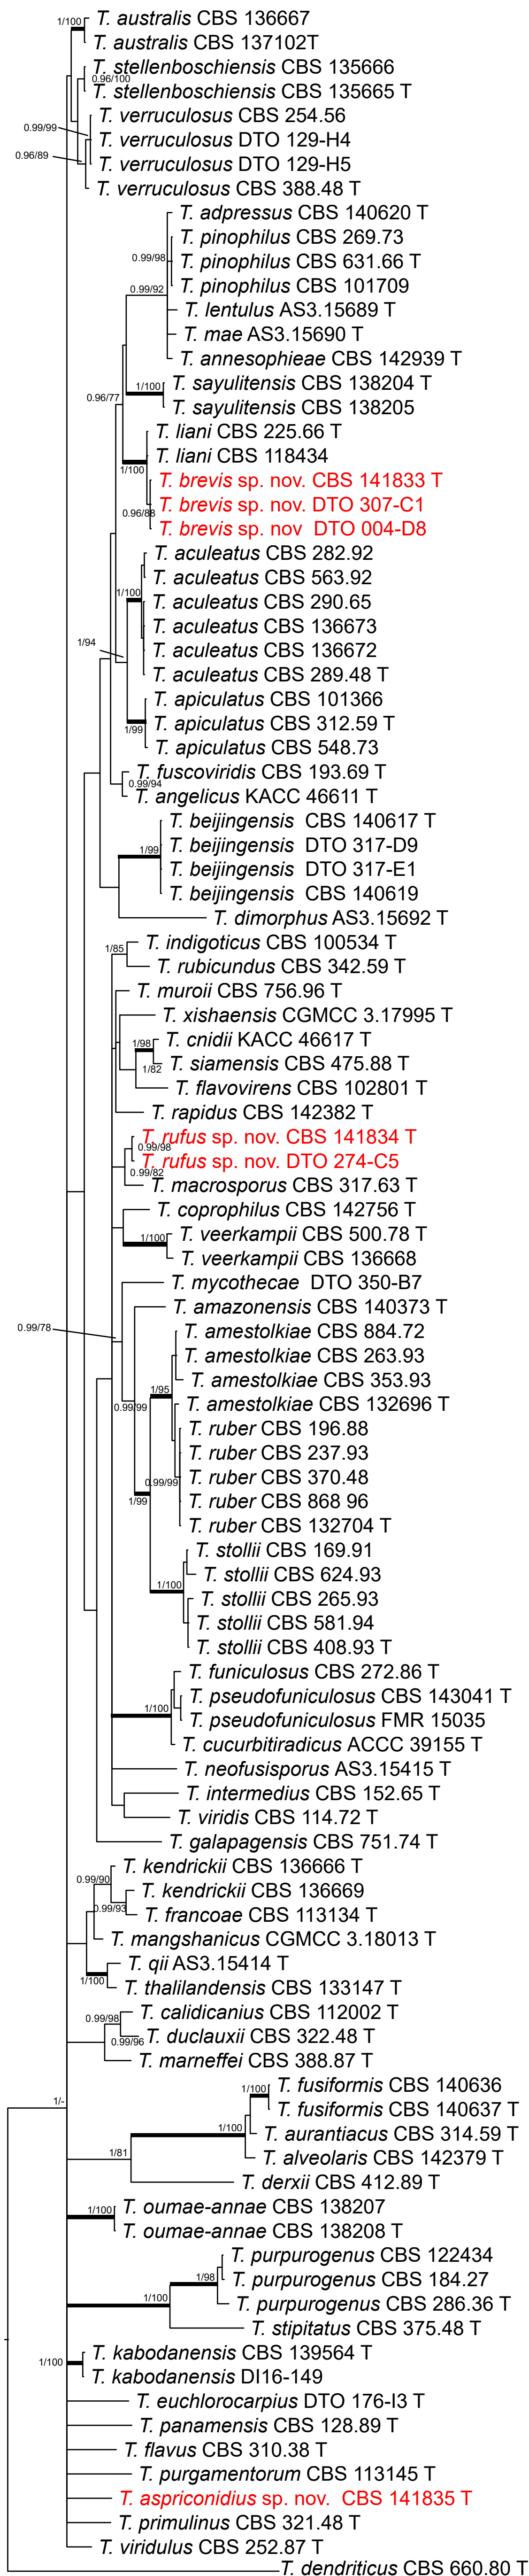

Supplement: mycokeys-68-075-s002.pdf [file mycokeys-68-075-s002.pdf]
