# Supplementary material for: New section and species in Talaromyces
Source: PubMed Central journal article supplement (PMC7360636; doi:10.3897/mycokeys.68.52092), 2020-07-07
Supplement: mycokeys-68-075-s008.pdf [file mycokeys-68-075-s008.pdf]

# Sect. *Subinflati* CaM

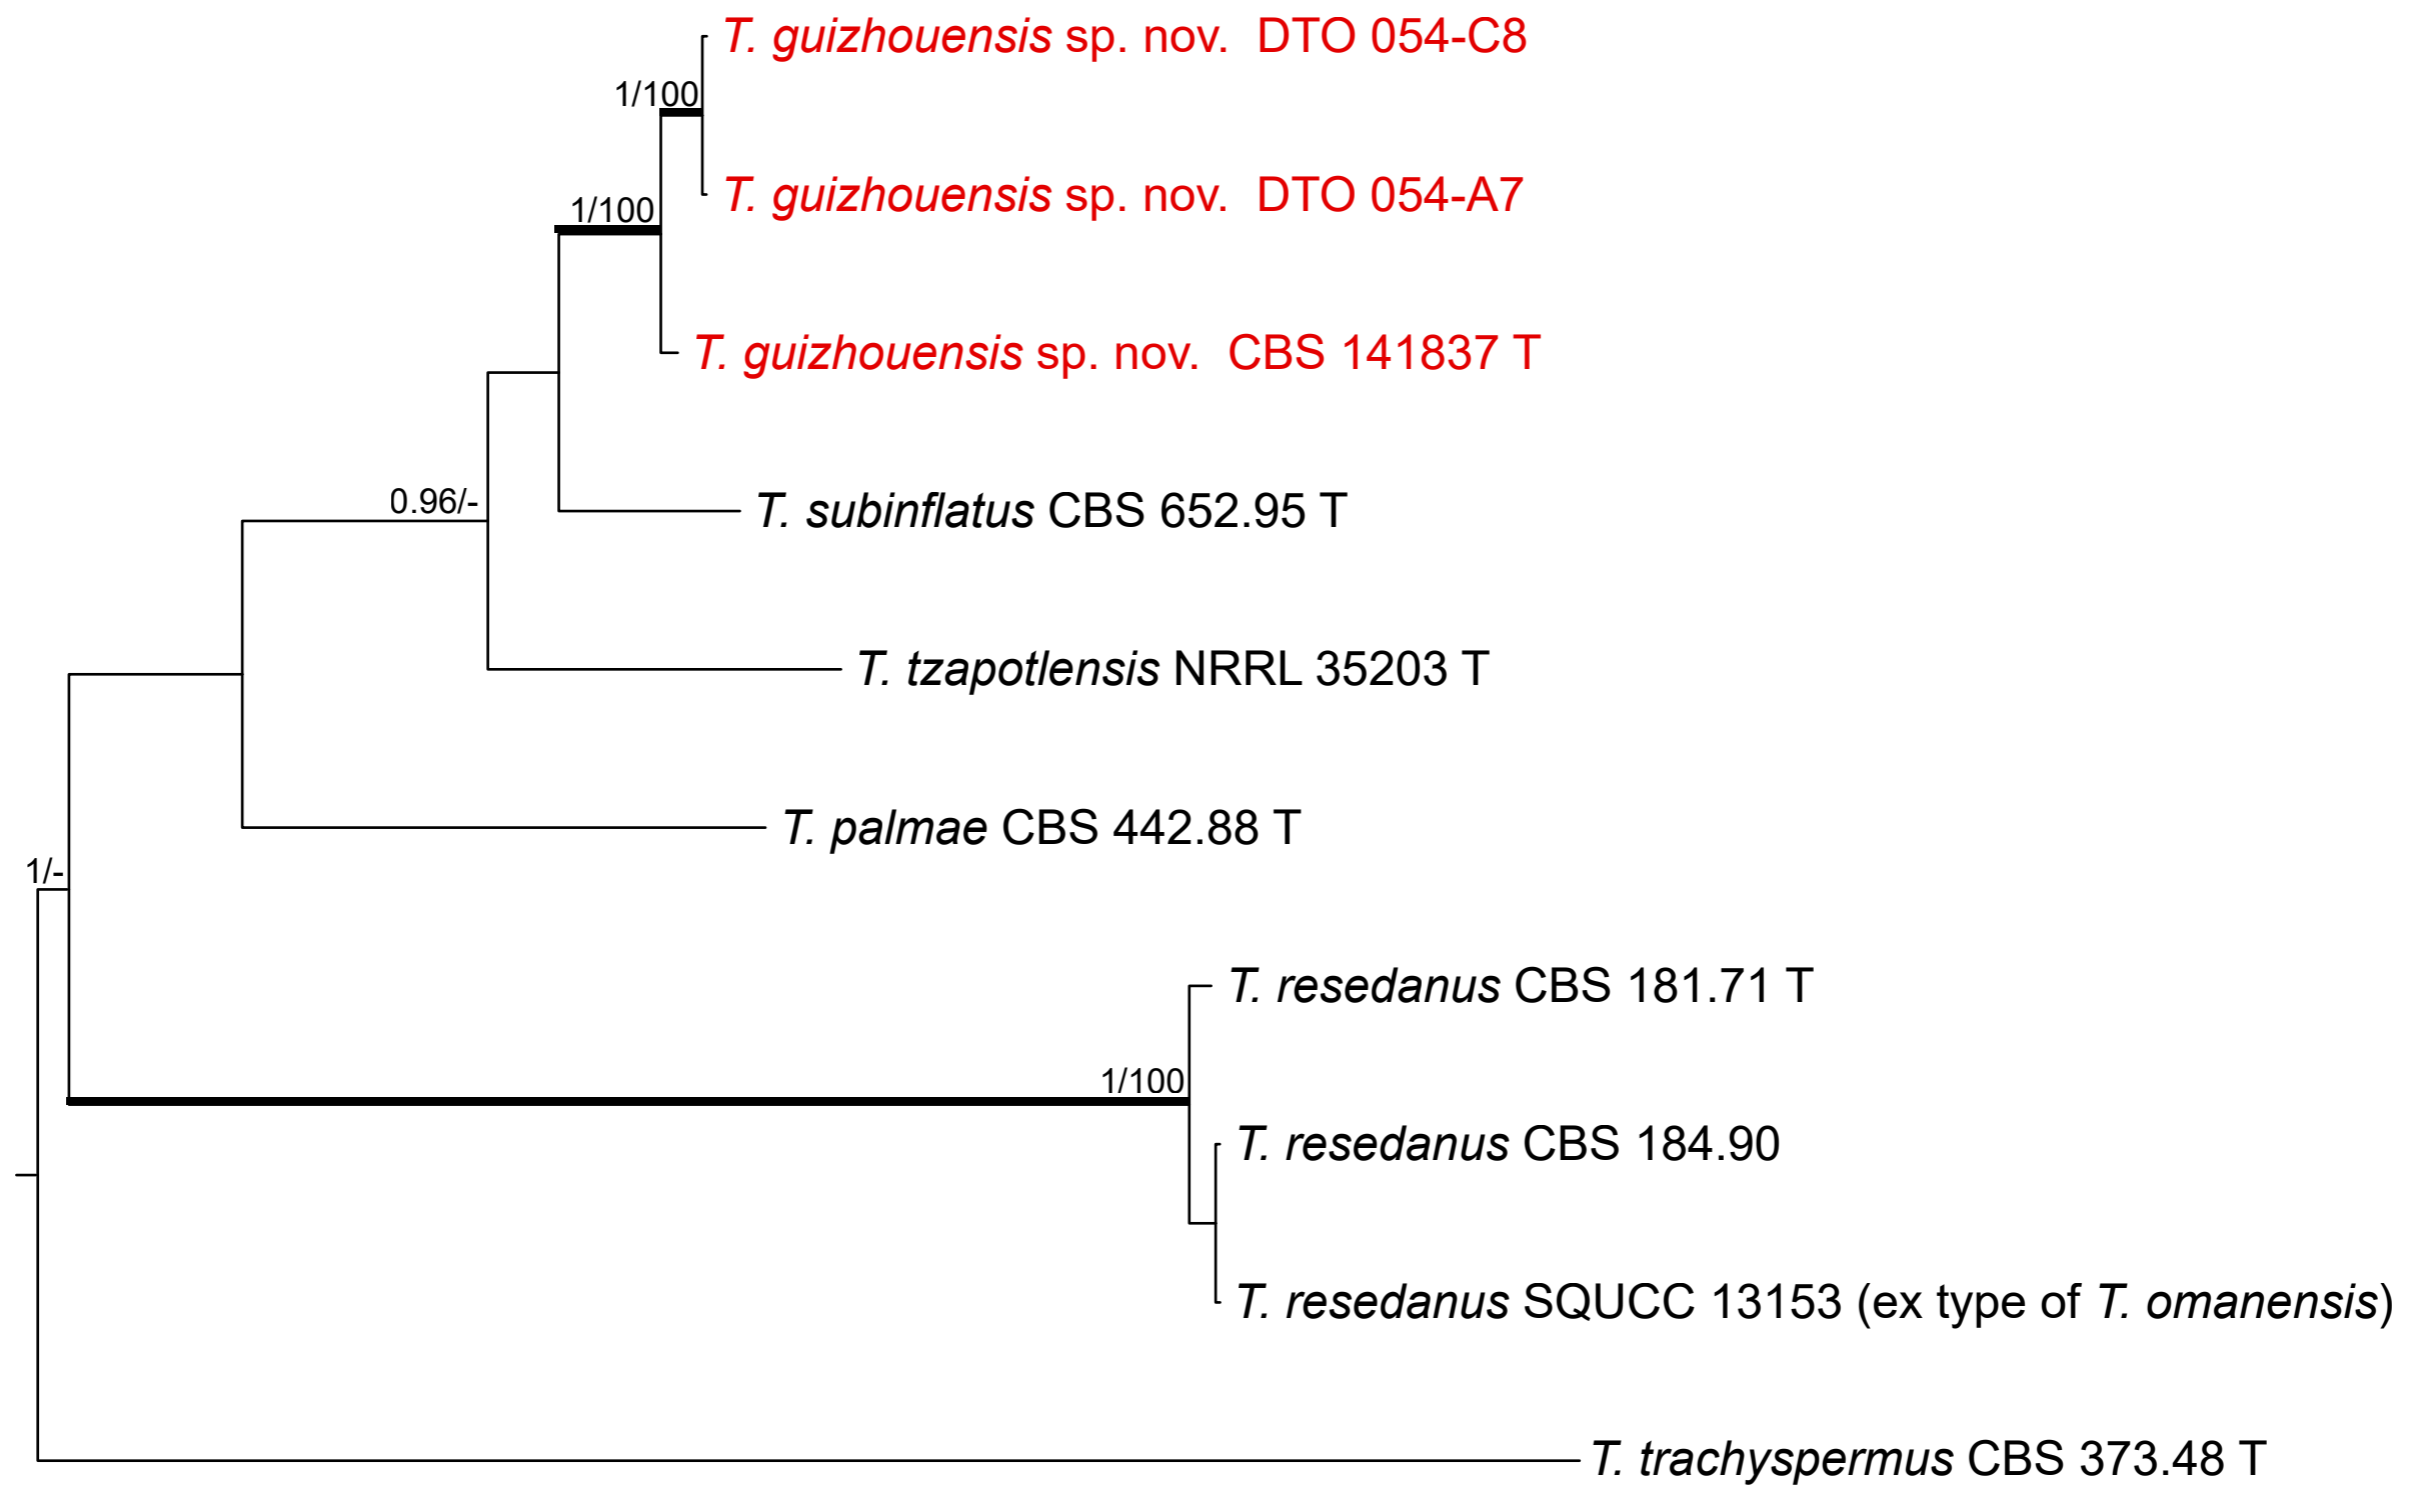

0.06
